# Supplementary material
Source: PubMed Central journal article supplement (PMC3271358)
Supplement: mmc1.pdf [file mmc1.pdf]

1 C(5) modified uracil derivatives showing antiproliferative  
2 and erythroid differentiation inducing activities on human  
3 chronic myelogenous leukemia K562 cells

4 Eleonora Brognara<sup>a</sup>, Ilaria Lampronti<sup>a</sup>, Giulia Breveglieri<sup>a</sup>, Alessandro Accetta<sup>b</sup>,  
5 Roberto Corradini<sup>b,\*</sup>, Alex Manicardi<sup>b</sup>, Monica Borgatti<sup>a</sup>, Alessandro Canella<sup>a</sup>, Chiara  
6 Multineddu<sup>a</sup>, Rosangela Marchelli<sup>b</sup>, Roberto Gambari<sup>a,\*</sup>

7 <sup>a</sup>*BioPharmaNet, Department of Biochemistry and Molecular Biology, Molecular*  
8 *Biology Division, University of Ferrara, Via Luigi Borsari, 46- 44100 Ferrara, Italy*

9 <sup>b</sup>*Department of Organic and Industrial Chemistry, University of Parma, Viale G.P.*  
10 *Usberti, 17/A- 43100 Parma, Italy*

11 \*Address correspondence to: Professor Roberto Gambari, Department of  
12 Biochemistry and Molecular Biology, University of Ferrara, Via Fossato di Mortara  
13 n.74, 44100 Ferrara, Italy; Tel: +39-532-974443; Fax: +39-532-974500; e-mail:  
14 gam@unife.it

15  
16 **Supplementary Data**

17  
18 **1. Supplementary methods**

19 *1.1. Benzidine assay*

20 In order to determine effects on erythroid differentiation, benzidine-positive cells was  
21 identified using a solution containing 0.2% benzidine in 0.5 M glacial acetic acid  
22 (10% H<sub>2</sub>O<sub>2</sub>) as previously described (Bianchi et al., 2001). Benzidine positivity  
23 indicates the presence of intracellular hemoglobin.

24  
25 *1.2. High Performance Liquid Chromatography*

26 K562 cells were harvested, washed once with phosphate buffered saline (PBS), and  
27 the pellets were lysed in water. After incubation on ice for 15 min and spinning for 5

28 min at 10,000 rcf in a microcentrifuge, the supernatant was collected and  
29 hemoglobin proteins were separated by cation-exchange HPLC, using a Beckman  
30 Coulter instrument System Gold 126 Solvent Module-166 Detector and a 3.5 x 0.46  
31 cm column packed with porous (100-nm pore size) 5-mm microparticulate  
32 polyaspartic acid-silica, Poly CAT A (Poly LC, Columbia MD, USA) (Ching et al.,  
33 1993). Samples were eluted in a solvent gradient using aqueous sodium chloride-  
34 BisTris-KCN buffers, and detection was performed at 415 nm. The gradient was  
35 made up of mobile phase A (20 mM Bis Tris, 2 mM KCN, pH 6.98) and mobile  
36 phase B (20 mM Bis Tris, 2 mM KCN, 200 mM NaCl, pH 6.57), with a flow rate of  
37 1.7 ml/min. Elution of hemoglobins was performed by increasing buffer B from 11%  
38 to 40% and to 100% at 8 and 12 min, respectively, and then decreasing to 11%  
39 buffer B for the least 8 min before application of next sample. The peak areas were  
40 used for quantitation of individual hemoglobin peaks, utilizing standard controls of  
41 HbA and HbF (Analytical Control Systems, Fishers IN, USA) (Fibach et al., 2003).

42

### 43 *1.3. Flow cytometry*

44 Cell cycle analysis was performed by flow cytometry of propidium iodide-treated  
45 cells, using the FACS Calibur Becton Dickinson Immunocytometry System (Becton  
46 Dickinson, San Jose, CA, USA). The cells were collected, washed with PBS and  
47 centrifuged at 400 rcf for 5 minutes. The supernatant was eliminated and the cells  
48 were stained in the dark for 30 minutes with propidium iodide (50µg/ml), NP40 and  
49 RNase (10 µg/µl). After incubation, cells were washed twice with PBS, centrifuged  
50 at 400 rcf for 5 minutes and analyzed (Chui et al., 2010).

51

### 52 *1.4. Measurement of apoptosis*

53 Apoptotic cells were detected by the DeadEnd™ Colorimetric TUNEL System  
54 (Promega Italia, Milan, Italy) according to the manufacturer's instructions. K562 cells  
55 were treated with the increasing concentrations of compounds; after 5 days, (when  
56 differentiated) the cells were rinsed twice with PBS solution and fixed for 25 min in  
57 4% paraformaldehyde at room temperature. Measurement of apoptosis was

58 calculated as a percentage of apoptotic nuclei (dark brown nuclei) versus total  
59 nuclei, evaluated in three independent experiments. A dark brown DAB signal  
60 indicates positive staining, while shades of blue-green to greenish tan indicate a  
61 non-reactive cell. The positive-control was the treatment with DNA-se 1 (Lampronti  
62 et al., 2009). Apoptosis was also detected with Annexin V/PI release assay. Cells  
63 were treated with the compounds and, after 72 hours, cells were collected,  
64 centrifuged for 5 min at 400 rcf. Cells were rinsed with Binding Buffer and then  
65 annexin V was added and the samples were incubated at room temperature for 15  
66 min in the dark, according to the manufacturer's instructions. For the analysis we  
67 have used FACS Calibur Becton Dickinson Immunocytometry System (Becton  
68 Dickinson, San Jose, CA, USA) (Viola et al., 2008).

69

## 70 **2. Supplementary References**

71

72 Bianchi, N., Chiarabelli, C., Borgatti, M., Mischiati, C., Fibach, E., Gambari, R., 2001.  
73 Accumulation of gamma-globin mRNA and induction of erythroid differentiation after  
74 treatment of human leukaemic K562 cells with tallimustine. *Br. J. Haematol.* 113,  
75 951-961.

76 Chui, C.H., Wang, Q., Chow, W.C., Yuen, M.C., Wong, K.L., Kwok, W.M., Cheng,  
77 G.Y., Wong, R.S., Tong, S.W., Chan, K.W., Lau, F.Y., Lai, P.B., Lam, K.H., Fabbri,  
78 E., Tao, X.M., Gambari, R., Wong, W.Y., 2010. 5-(Dimethylamino)-N-(4-  
79 ethynylphenyl)-1-naphthalenesulfonamide as a novel bifunctional antitumor agent  
80 and two-photon induced bio-imaging probe. *Chem. Commun (Camb)* 46, 3538-40.

81

82 Fibach, E., Bianchi, N., Borgatti, M., Prus, E., Gambari, R., 2003. Mithramycin  
83 induces fetal hemoglobin production in normal and thalassemic human erythroid  
84 precursor cells. *Blood* 102, 1276-1281.

85

86 Lampronti, I., Bianchi, N., Zuccato, C., Dall'acqua, F., Vedaldi, D., Viola, G., Potenza,  
87 R., Chiavilli, F., Breveglieri, G., Borgatti, M., Finotti, A., Feriotto, G., Salvatori, F.,  
88 Gambari, R., 2009. Increase in gamma-globin mRNA content in human erythroid cells  
89 treated with angelicin analogs. *Int J Hematol.* 90, 318-327.

90 Viola, G., Vedaldi, D., Dall'Acqua, F., Fortunato, E., Basso, G., Bianchi, N., Zuccato,  
91 C., Borgatti, M., Lampronti, I., Gambari, R., 2008. Induction of gamma-globin mRNA,  
92 erythroid differentiation and apoptosis in UVA-irradiated human erythroid cells in the  
93 presence of furocumarin derivatives. *Biochem Pharmacol.* 75, 810-25.

94

95 **3. Supplementary Figures**

96

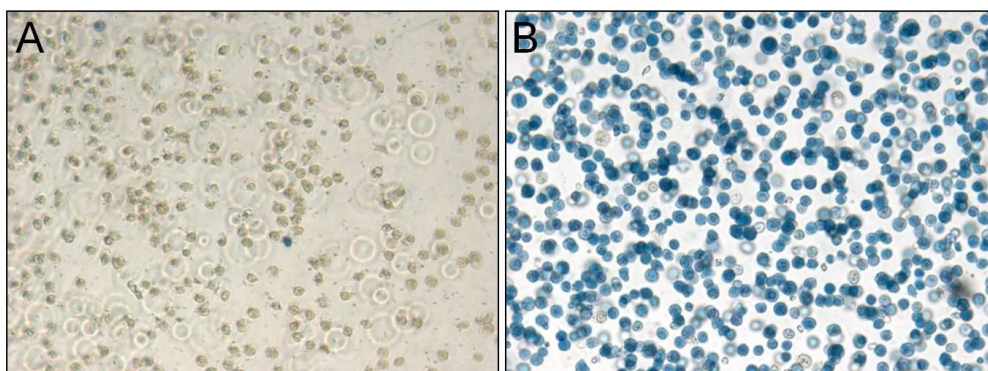

97

98 **Supplementary Fig. 1.** Effects on erythroid differentiation of K562 cells. The  
99 images of benzidine staining assay were taken after 6 days of K562 cell culture in  
100 the absence (A) or in presence (B) of 30 μM compound 9.

101

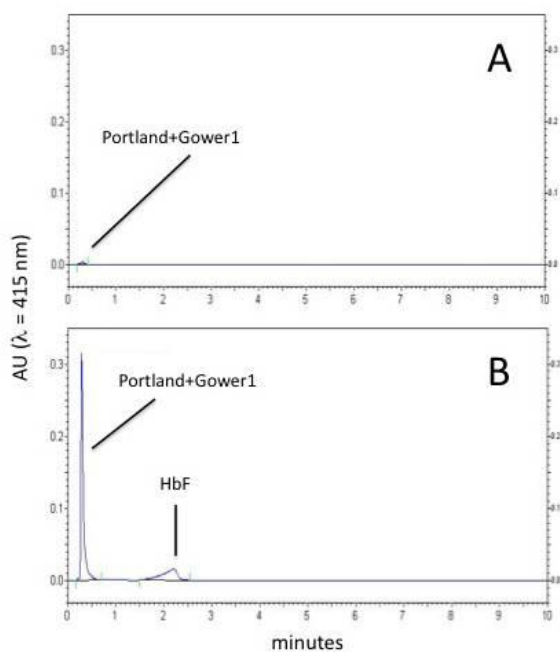

102

103 **Supplementary Fig. 2.** HPLC analysis of K562 cellular lysates: chromatogram A  
104 shows the hemoglobin profile (Hb Portland and Hb Gower1) in untreated cells,  
105 chromatogram B presents the increased production of Hb Portland/Gower1 and HbF  
106 in K562 cells treated with compound 9.

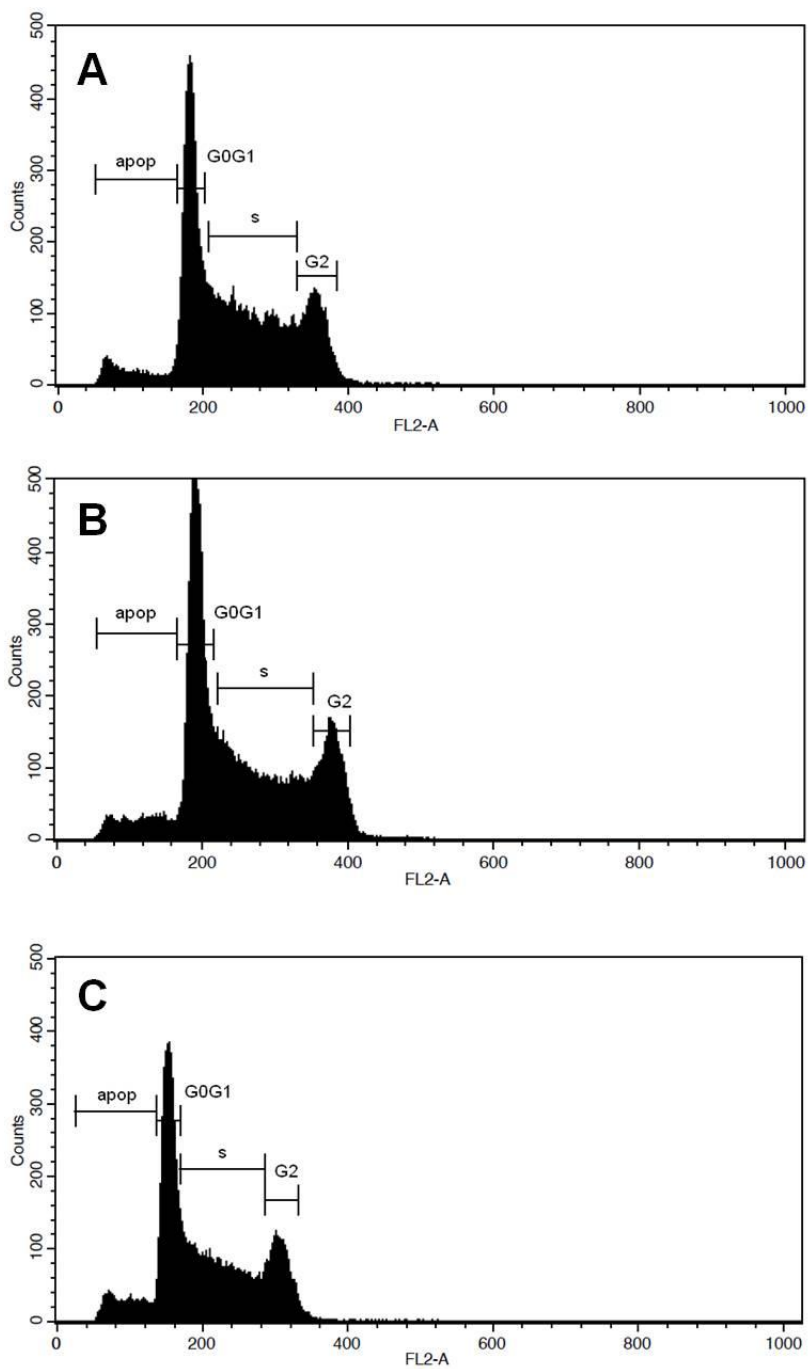

107

108

109

110

111

112

**Supplementary Fig. 3.** Analysis of cell cycle using a fluorescence-activated cell sorter (FACS). A: untreated K562 cells; B,C: K562 cells treated with 30  $\mu$ M (B) and 50  $\mu$ M (C) compound **9**. Similar data were reproducibly obtained in three independent experiments.

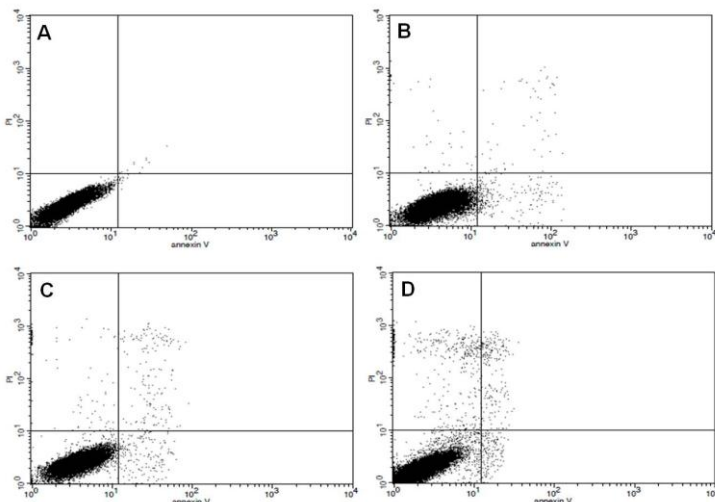

113

114

115

116

117

118

**Supplementary Fig. 4.** Apoptosis of K562 cells were detected by flow cytometry after annexin V–FITC staining. For this analysis the cells were treated with annexin V and PI (B), 30  $\mu$ M (C) and 50  $\mu$ M (D) compound **9**. Panel A represents untreated K562 cells.

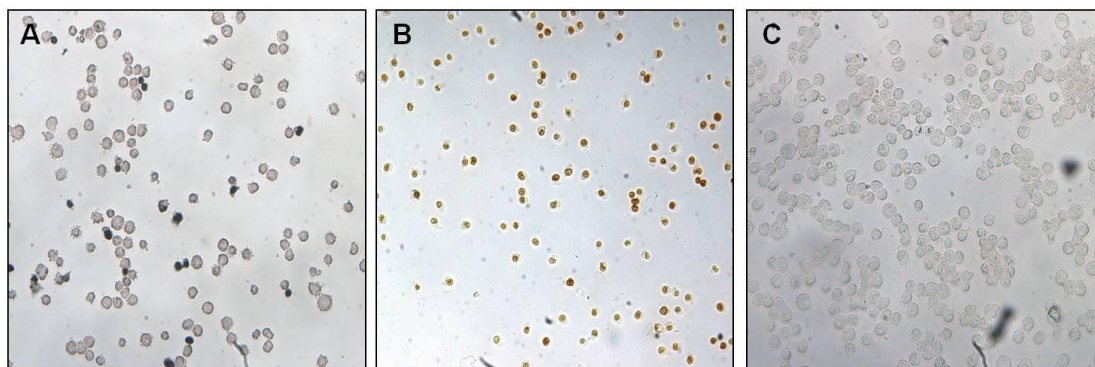

119

120

121

122

123

124

**Supplementary Fig. 5.** Detection of apoptosis by DeadEnd TUNEL assay in K562 cell line (A), treated with DNase I (1U/ml) (B), 30  $\mu$ M compound **9** (C). Brown color reaction, visible only in the treatment with the DNase I, indicates apoptotic cells. Cells were photographed at a magnification of 20X.
